# Supplementary material for: SGK3 promotes vascular calcification via Pit-1 in chronic kidney disease
Source: PubMed Central journal article supplement (PMC10758069; doi:10.7150/thno.87317), 2024-01-01
Supplement: thnov14p0861s1.pdf [file thnov14p0861s1.pdf]

## Supplementary materials

Table S1 Characteristics and biochemical parameters of healthy (control) and uremic serum.

|                                     | Control serum   | Uremic serum        |
|-------------------------------------|-----------------|---------------------|
| Creatinine ( $\mu\text{mol/L}$ )    | $67.2 \pm 13.6$ | $946.83 \pm 307.34$ |
| Urea nitrogen ( $\text{mmol/L}$ )   | $3.55 \pm 1.00$ | $31.48 \pm 10.89$   |
| Serum calcium ( $\text{mmol/L}$ )   | $2.45 \pm 0.11$ | $1.91 \pm 0.38$     |
| Serum phosphate ( $\text{mmol/L}$ ) | $1.22 \pm 0.15$ | $2.27 \pm 0.62$     |

Biochemical parameters are given as average  $\pm$  SE in the indicated units.

Supplemental Fig. 1

A

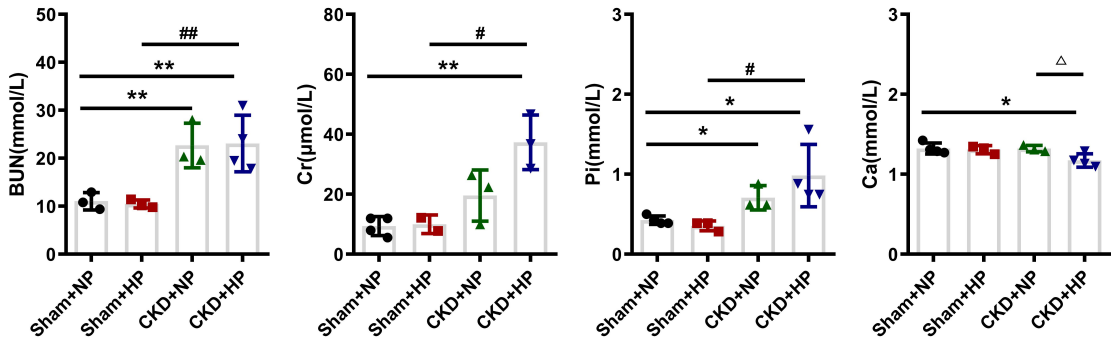

B

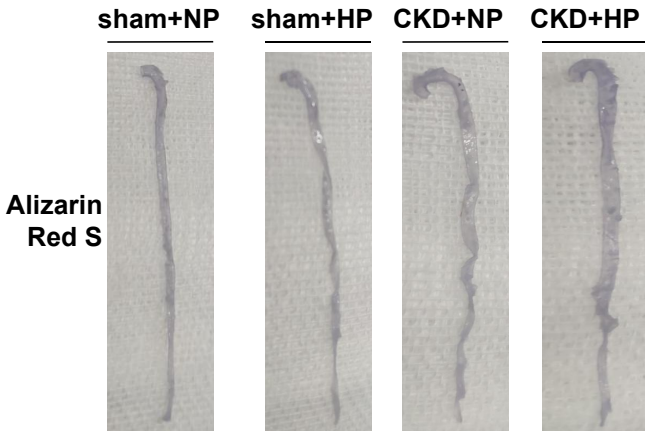

C

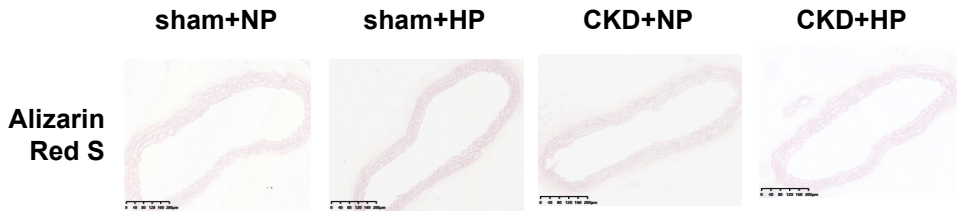

Supplemental Fig. 2

A

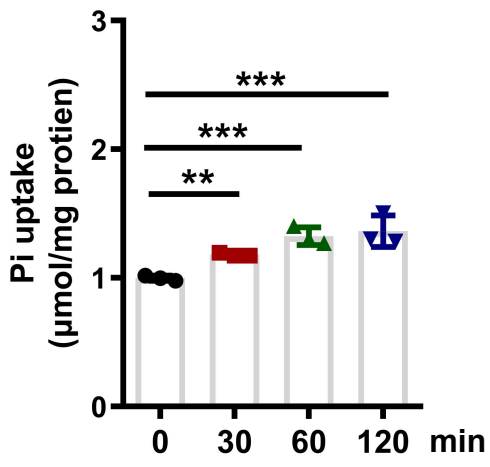

B

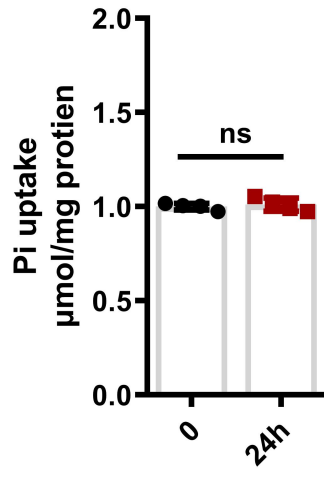

C

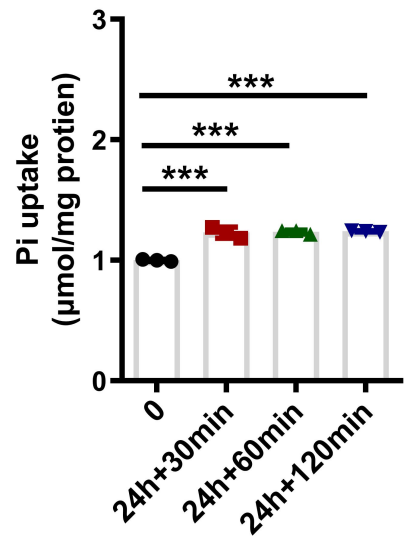

Supplemental Fig. 3

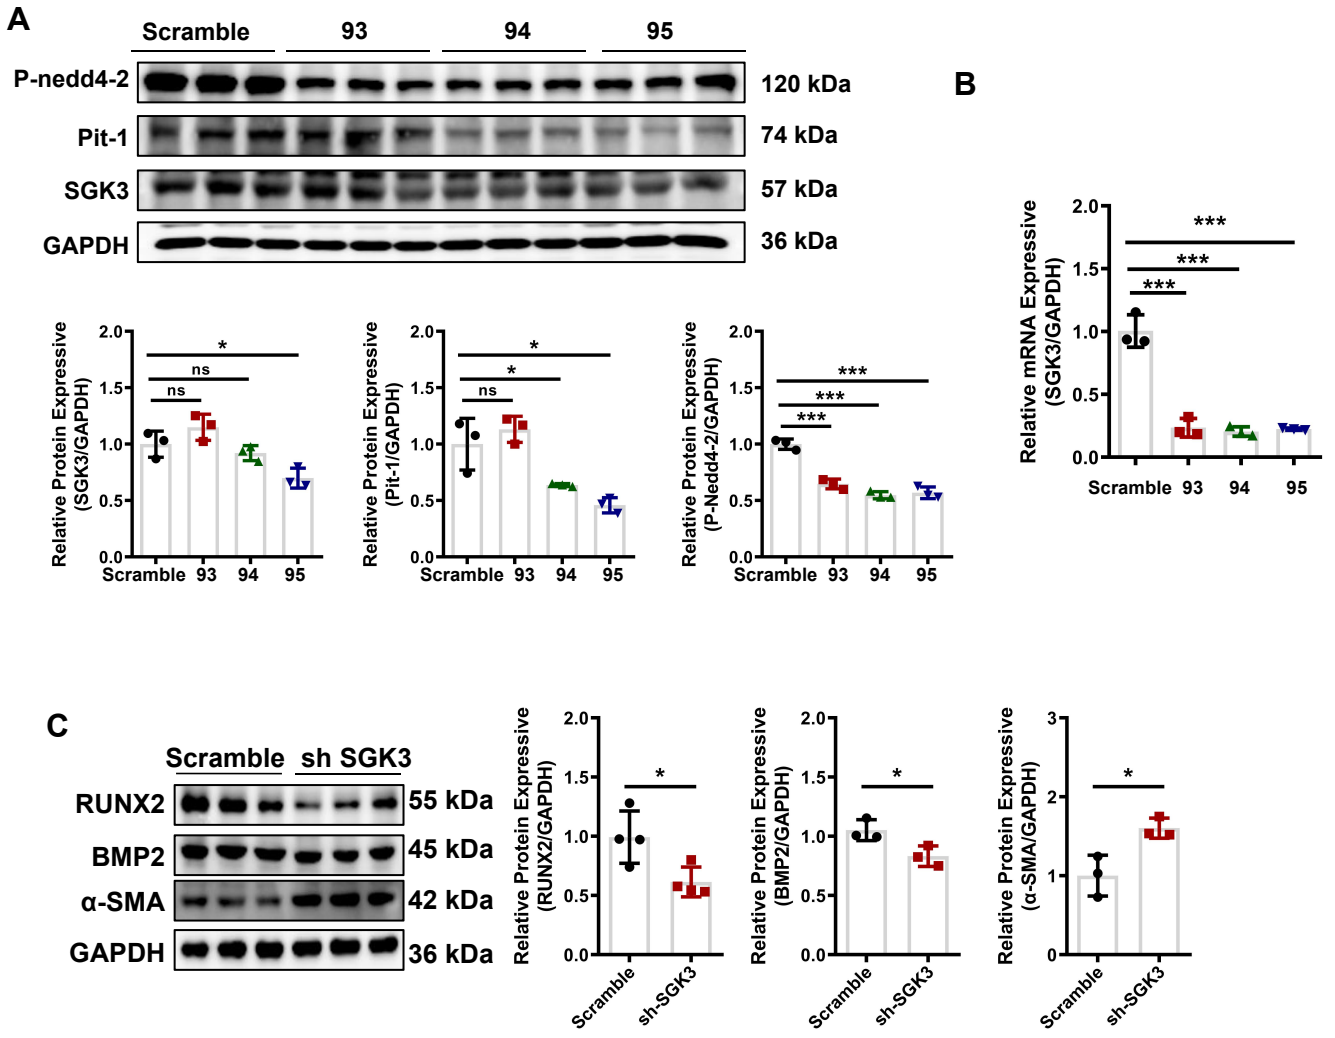

Supplemental Fig. 4

A

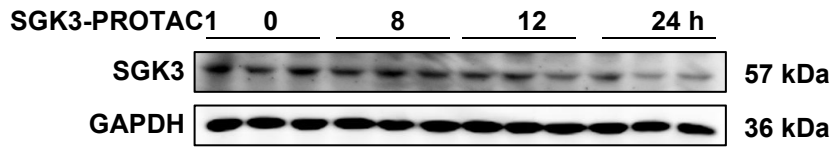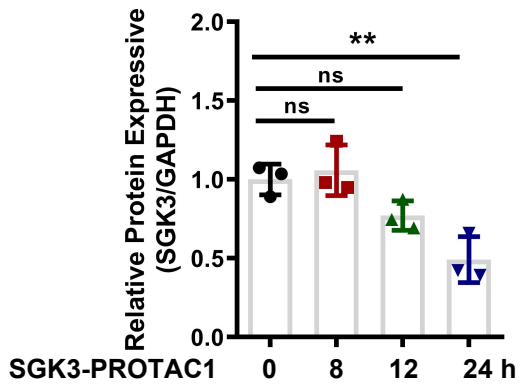

B

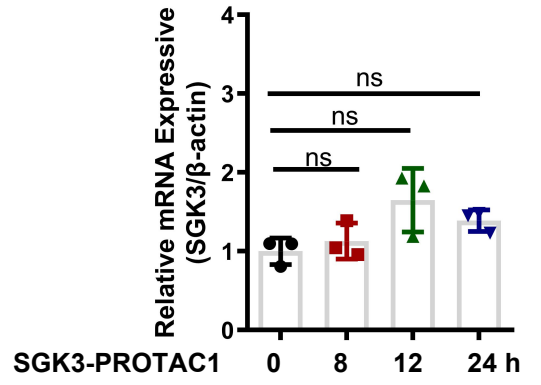

# Supplemental Fig.5

**A**

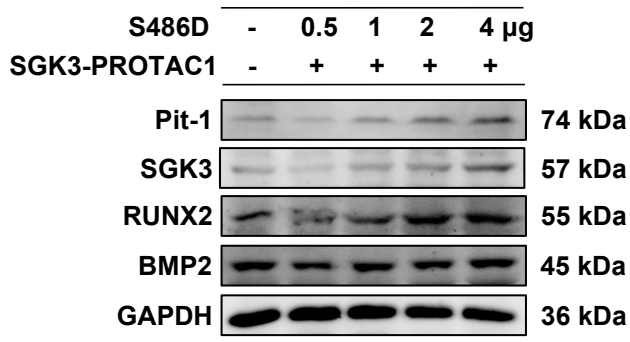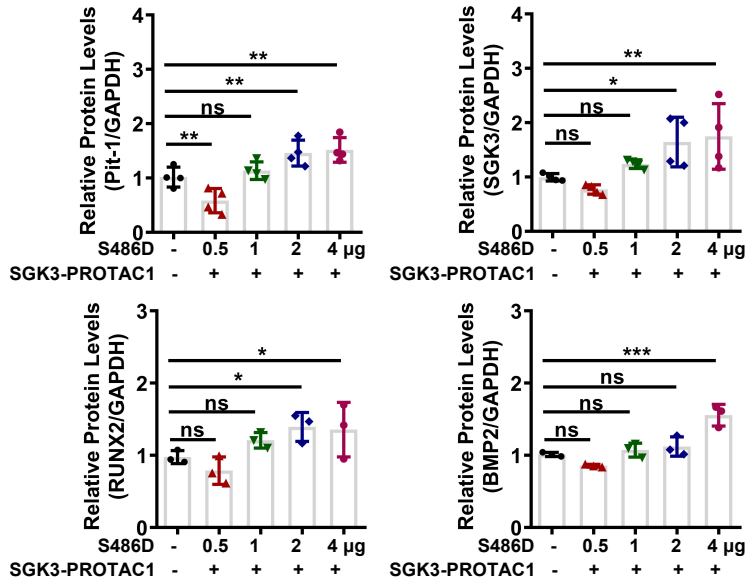

**B**

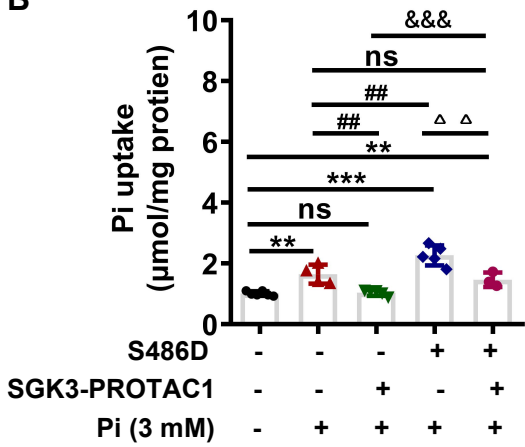

# Supplemental Fig.6

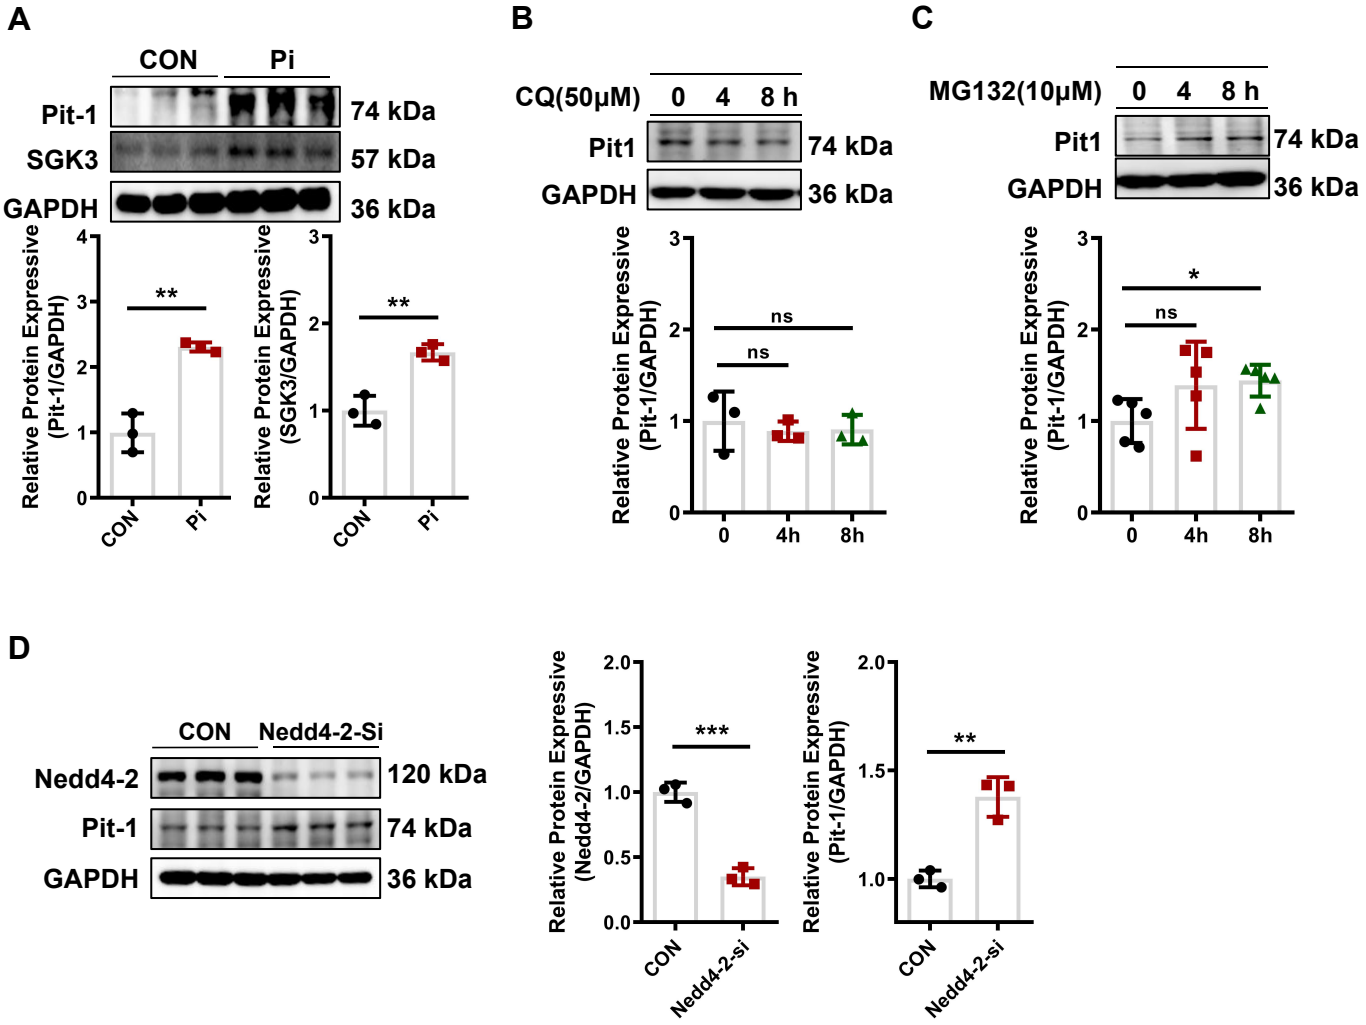

## Supplementary figure legends

### **Supplemental Figure 1. There is not vascular calcification in C57BL/6J mice.**

Male C57BL/6J mice modeled with CKD by 5/6 nephrectomy and fed with a high-phosphate diet for 8 weeks after surgery. **A.** At the experimental end point, blood urea nitrogen (BUN), serum creatinine (Cr), calcium (Ca), and phosphate (Pi) were detected. **B, C.** Alizarin red S staining, representative staining of Alizarin red S was detected in the aorta of CKD mice.

### **Supplemental Figure 2. The phosphate uptake at different times in VSMCs. A.**

Mouse VSMCs treated with 3 mM Pi for 30 min, 60 min, 120 min, Pi levels were determined from cell lysates by Pi Assay Kit. **B.** Mouse VSMCs treated with 3 mM Pi for 24 h, Pi levels were determined from cell lysates by Pi Assay Kit. ns vs. control group. **C.** Mouse VSMCs treated with 3 mM Pi for 24h, and then restimulation for 30 min, 60 min, 120 min after elution, Pi levels were determined from cell lysates by Pi Assay Kit. **\*\* $P < 0.01$ , \*\*\* $P < 0.001$  vs. control group.**

### **Supplemental Figure 3. Inhibition of SGK3 attenuated the expression of Pit-1 and phenotype switching in vitro. A.**

Mouse VSMCs were infected with scramble or three different lentiviruses knockdown sequences of SGK3 named 93, 94, 95 for 72 h. Western blot analysis of SGK3, Pit-1 and P-Nedd4-2. **B.** Mouse VSMCs were infected with scramble or SGK3 shRNA 95 (sh-SGK3) for 7 d. Western blot analysis of SGK3 BMP2, Runx2,  $\alpha$ -SMA and Pit-1. **\* $P < 0.05$ , \*\* $P < 0.01$ , \*\*\* $P < 0.001$  vs. scramble group.**

### **Supplemental Figure 4. Transcription level as well as protein level of SGK3 after treated with SGK3-PROTAC1. A, B.**

Mouse VSMCs treated with 2.5  $\mu$ mol/L SGK3-PROTAC1 for 8 h, 12 h, 24 h. Immunoblot of SGK3 cleavage of cell lysates **(A)**. The transcription levels of SGK3 measured by qPCR **(B)**. **\*\* $P < 0.01$  vs. control group.**



**Supplemental Figure 5. The calcification change and phosphate uptake of Overexpression of SGK3 after treated with SGK3-PROTAC1.** **A.** Mouse VSMCs transiently transfected with SGK3-S486D plasmid (0.5  $\mu$ g, 1  $\mu$ g, 2  $\mu$ g, 4  $\mu$ g) for 48 h, and treated with 2.5  $\mu$ mol/L SGK3-PROTAC1 for 24 h. Western blot and related semi-quantificated analysis of SGK3, Pit-1, RUNX2 and BMP2. **B.** Mouse VSMCs transiently transfected with S686D plasmid (1  $\mu$ g) for 48 h, treated with 2.5  $\mu$ mol/L SGK3-PROTAC1 for 24 h and 3 mM Pi for 2 h. Pi levels were determined from cell lysates by Pi Assay Kit. \*\* $P < 0.01$ , \*\*\* $P < 0.001$  vs. control group; ## $P < 0.01$  vs. Pi group;  $\Delta \Delta P < 0.01$  vs. S486D+Pi group; &&& $P < 0.001$  vs. SGK3-PROTAC1+Pi group.

**Supplemental Figure 6. The expression levels of Pit-1 in HaSMCs.** **A.** Human VSMCs treated with 3 mM Pi for 7 days. Western blot and related semi-quantificated analysis of SGK3 and Pit-1. **B.** Human VSMCs treated with 50  $\mu$ M chloroquine (CQ) for 4 and 8 h. The protein levels of Pit-1 were measured by western blot. **C.** Human VSMCs treated with 10  $\mu$ M MG132 for 4 and 8 h. The protein levels of Pit-1 were measured by western blot. **D.** Human VSMCs transiently transfected with Nedd4-2 si-RNA for 48 h. The protein levels of Pit-1 and Nedd4-2 were measured by western blot. \* $P < 0.05$ , \*\* $P < 0.01$ , \*\*\* $P < 0.001$  vs. the control group.
